# Supplementary material for: Boosting the broadband orange emission in organic–inorganic hybrid (DPG)3InBr6viaantimony doping
Source: Royal Society of Chemistry journal article supplement (doi:10.1039/d3nj01019h), 2023-01-01
Supplement: d3nj01019h1.pdf [file d3nj01019h1.pdf]

## Supporting Information

### **Boosting the broadband orange emission in organic-inorganic hybrid metal halide of (DPG)<sub>3</sub>InBr<sub>6</sub> via antimony doping**

Shuya Jin <sup>a</sup>, Qilin Wei <sup>a</sup>, Hui Peng <sup>\*b</sup>, Bao Ke <sup>a</sup>, Wenchao Lin <sup>b</sup>, Bin He <sup>b</sup>, Xianci Zhong <sup>c</sup>, Bingsuo Zou <sup>\*a, b</sup>

<sup>a</sup> School of Physical Science and Technology, Guangxi University, Nanning 530004, China.

<sup>b</sup> State Key Laboratory of Featured Metal Materials and Life-cycle Safety for Composite Structures, School of Resources, Environments and Materials, Guangxi University, Nanning 530004, China.

<sup>c</sup> Key Laboratory of Disaster Prevention and Structural Safety of Ministry of Education, Guangxi University, Nanning 530004, China.

Corresponding Authors: penghuimaterial@163.com (H.P.); zoubs@gxu.edu.cn (B.Z.)

**Table S1** Crystal data and structure refinement for (DPG)<sub>3</sub>InBr<sub>6</sub>.

|                                                 |                                                                  |
|-------------------------------------------------|------------------------------------------------------------------|
| Empirical formula                               | (DPG) <sub>3</sub> InBr <sub>6</sub>                             |
| Chemical formula                                | C <sub>39</sub> H <sub>42</sub> Br <sub>6</sub> InN <sub>9</sub> |
| Formula weight                                  | 1231.05                                                          |
| Temperature (K)                                 | 296.15                                                           |
| Crystal system                                  | Trigonal                                                         |
| Space group                                     | R-3                                                              |
| a (Å)                                           | <i>a</i> = 16.613(3)Å                                            |
| b (Å)                                           | <i>b</i> = 16.613Å                                               |
| c (Å)                                           | <i>c</i> = 14.280(3)Å                                            |
| α (deg)                                         | α = 90°                                                          |
| β (deg)                                         | β = 90°                                                          |
| γ (deg)                                         | γ = 120°                                                         |
| Volume (Å <sup>3</sup> )                        | 3413.1(13)                                                       |
| Z                                               | 3                                                                |
| Density (calculated) (g·cm <sup>-3</sup> )      | 1.797                                                            |
| Absorption coefficient (mm <sup>-1</sup> )      | 5.826                                                            |
| <i>F</i> (000)                                  | 1794                                                             |
| Index ranges                                    | -21 ≤ <i>h</i> ≤ 15, -17 ≤ <i>k</i> ≤ 20, -18 ≤ <i>l</i> ≤ 14    |
| Reflections collected                           | 88712                                                            |
| Data completeness                               | 99.9%                                                            |
| Data/restraints/parameters Goodness-of-fit      | 1740/0/132                                                       |
| Goodness of fit                                 | 1.013                                                            |
| R (reflections)                                 | 0.0288                                                           |
| wR2 (reflections)                               | 0.0750                                                           |
| Largest diff. peak and hole (eÅ <sup>-3</sup> ) | 0.7 and -0.5                                                     |

**Table S2** Bond angles of (DPG)<sub>3</sub>InBr<sub>6</sub> and (DPG)<sub>3</sub>InBr<sub>6</sub>: Sb single crystal.

|                                           |            |             |             |             |
|-------------------------------------------|------------|-------------|-------------|-------------|
| (DPG) <sub>3</sub> InBr <sub>6</sub>      | Geometry   | Br1-In1-Br2 | Br1-In1-Br3 | Br1-In1-Br4 |
|                                           | Bond angle | 88.1365°    | 88.1412°    | 91.8683°    |
|                                           | Geometry   | Br1-In1-Br5 | Br2-In1-Br3 | Br3-In1-Br4 |
|                                           | Bond angle | 91.8633°    | 91.8623°    | 88.141°     |
|                                           | Geometry   | Br4-In1-Br5 | Br5-In1-Br2 | Br2-In1-Br1 |
|                                           | Bond angle | 91.8628°    | 88.1340°    | 91.8595°    |
|                                           | Geometry   | Br3-In1-Br1 | Br4-In1-Br1 | Br5-In1-Br1 |
|                                           | Bond angle | 91.8620°    | 88.1357°    | 88.1334°    |
| (DPG) <sub>3</sub> InBr <sub>6</sub> : Sb | Geometry   | Br1-In1-Br5 | Br3-In1-Br5 | Br1-In1-Br4 |
|                                           | Bond angle | 83.6459°    | 91.3516°    | 91.8897°    |
|                                           | Geometry   | Br3-In1-Br4 | Br4-In1-Br5 | Br2-In1-Br5 |
|                                           | Bond angle | 88.6608°    | 87.0720°    | 91.0878°    |
|                                           | Geometry   | Br3-In1-Br6 | Br1-In1-Br6 | Br2-In1-Br3 |
|                                           | Bond angle | 91.7631°    | 93.2307°    | 93.1254°    |
|                                           | Geometry   | Br2-In1-Br1 | Br2-In1-Br6 | Br4-In1-Br6 |
|                                           | Bond angle | 86.1734°    | 88.1281°    | 93.6156°    |

**Table S3** Bond lengths of (DPG)<sub>3</sub>InBr<sub>6</sub> and (DPG)<sub>3</sub>InBr<sub>6</sub>: Sb single crystal.

|                                           |             |           |           |           |
|-------------------------------------------|-------------|-----------|-----------|-----------|
| (DPG) <sub>3</sub> InBr <sub>6</sub>      | Geometry    | In1-Br1   | In1-Br3   | In1-Br5   |
|                                           | Bond length | 2.67738 Å | 2.67758 Å | 2.67763 Å |
|                                           | Geometry    | In1-Br2   | In1-Br4   | In1-Br6   |
|                                           | Bond length | 2.6774 Å  | 2.67747 Å | 2.67759 Å |
| (DPG) <sub>3</sub> InBr <sub>6</sub> : Sb | Geometry    | In1-Br1   | In1-Br3   | In1-Br5   |

|  |             |           |            |           |
|--|-------------|-----------|------------|-----------|
|  | Bond length | 2.70673 Å | 2.70649 Å  | 2.71687 Å |
|  | Geometry    | In1-Br2   | In1-Br4    | In1-Br6   |
|  | Bond length | 2.74784 Å | 2.716840 Å | 2.73621 Å |

**Table S4** Time-resolved PL decay curve of  $(\text{DPG})_3\text{InBr}_6$  with different doping concentrations (EX: 405 nm laser, EM: 630 nm).

|          | $(\text{DPG})_3\text{InBr}_6$ | $(\text{DPG})_3\text{InBr}_6$ :<br>1%Sb | $(\text{DPG})_3\text{InBr}_6$ :<br>5%Sb | $(\text{DPG})_3\text{InBr}_6$ :<br>10%Sb | $(\text{DPG})_3\text{InBr}_6$ :<br>30%Sb |
|----------|-------------------------------|-----------------------------------------|-----------------------------------------|------------------------------------------|------------------------------------------|
| $\tau_1$ | 4.3 ns<br>(70.8%)             | 9.3 ns<br>(65.3%)                       | 11.1 ns<br>(32.9%)                      | -                                        | -                                        |
| $\tau_2$ | 2.0 $\mu\text{s}$<br>(29.2%)  | 1.9 $\mu\text{s}$<br>(34.7%)            | 1.7 $\mu\text{s}$<br>(67.1%)            | 1.6 $\mu\text{s}$                        | 1.6 $\mu\text{s}$                        |

**Table S5** Time-resolved PL decay curve of  $(\text{DPG})_3\text{InBr}_6$  with different doping concentrations (EX: 405 nm laser, EM: 470 nm).

|          | $(\text{DPG})_3\text{InBr}_6$ | $(\text{DPG})_3\text{InBr}_6$ :<br>1%Sb | $(\text{DPG})_3\text{InBr}_6$ :<br>5%Sb | $(\text{DPG})_3\text{InBr}_6$ :<br>10%Sb | $(\text{DPG})_3\text{InBr}_6$ :<br>30%Sb |
|----------|-------------------------------|-----------------------------------------|-----------------------------------------|------------------------------------------|------------------------------------------|
| $\tau_1$ | 1.9 ns                        | 1.9 ns                                  | 2.6 ns                                  | 1.4 ns                                   | 1.6 ns                                   |

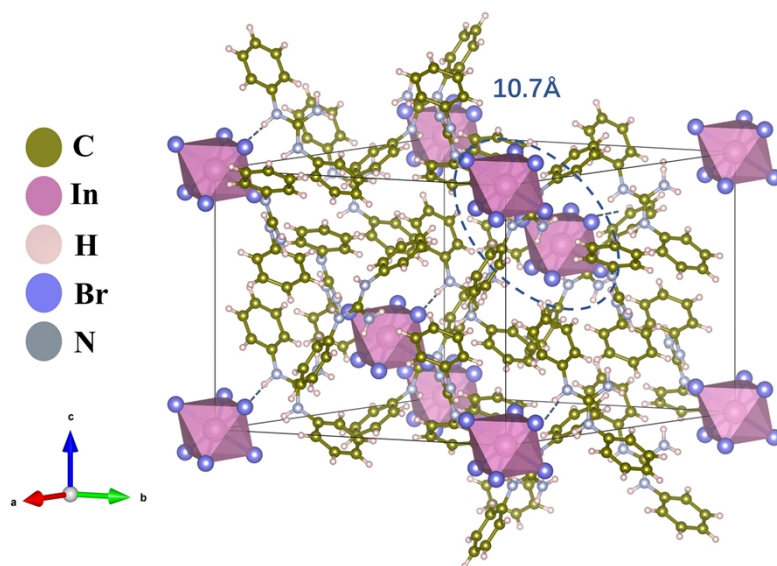

**Fig. S1** Crystal structure of  $(\text{DPG})_3\text{InBr}_6$ .

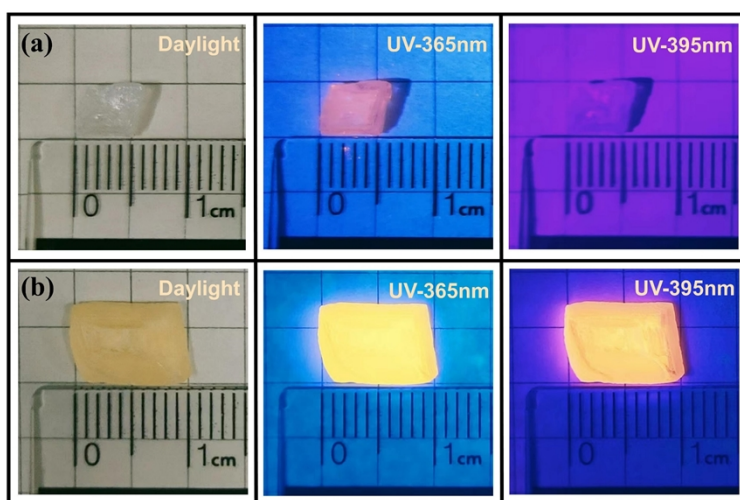

**Fig. S2** Images of  $(\text{DPG})_3\text{InBr}_6$  (a) and  $(\text{DPG})_3\text{InBr}_6$ : 10% Sb. (b) single crystals under daylight and UV-365 nm & 395 nm excitation.

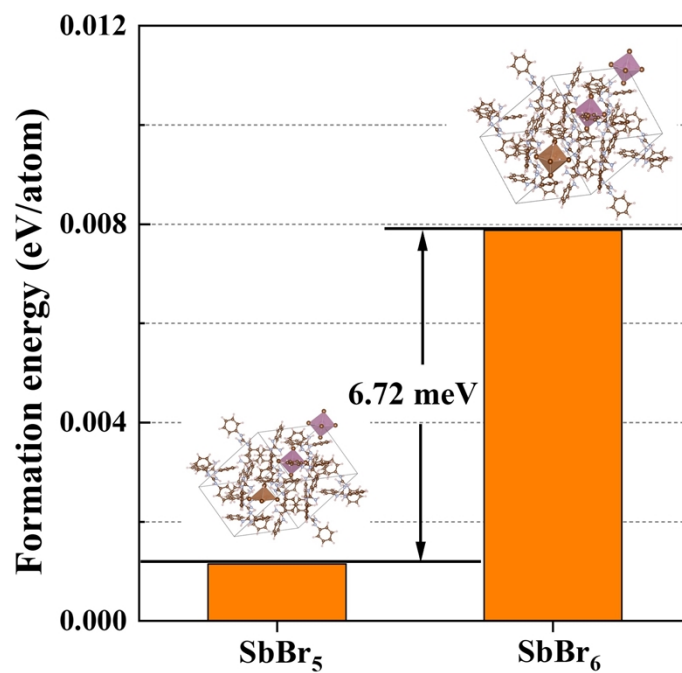

Fig. S3 Formation energy for  $(\text{DPG})_3\text{InBr}_6$ : Sb with five and six coordination numbers.

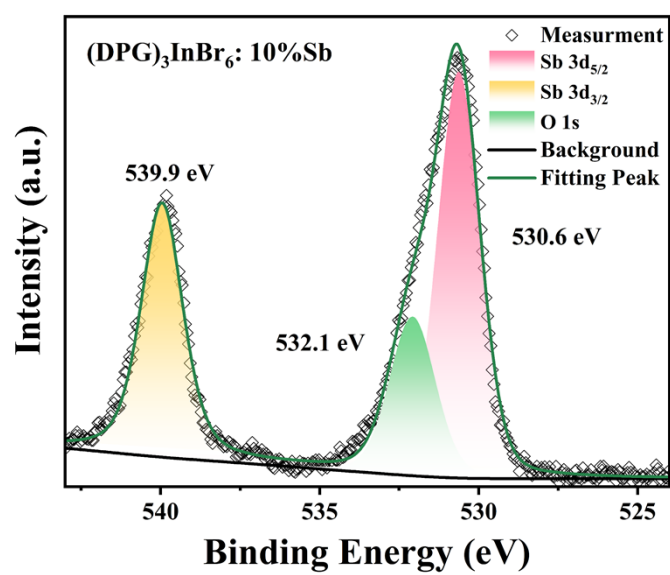

Fig. S4 High-resolution XPS spectra of O 1s and Sb  $3d_{3/2}$  and  $3d_{5/2}$  for  $(\text{DPG})_3\text{InBr}_6$ : 10% Sb.

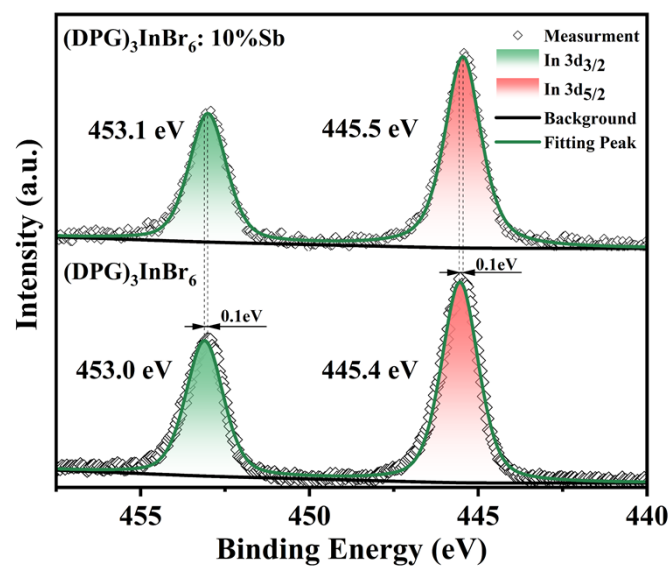

Fig. S5 High-resolution XPS image of  $(\text{DPG})_3\text{InBr}_6$  and  $(\text{DPG})_3\text{InBr}_6: 10\% \text{Sb}$ .

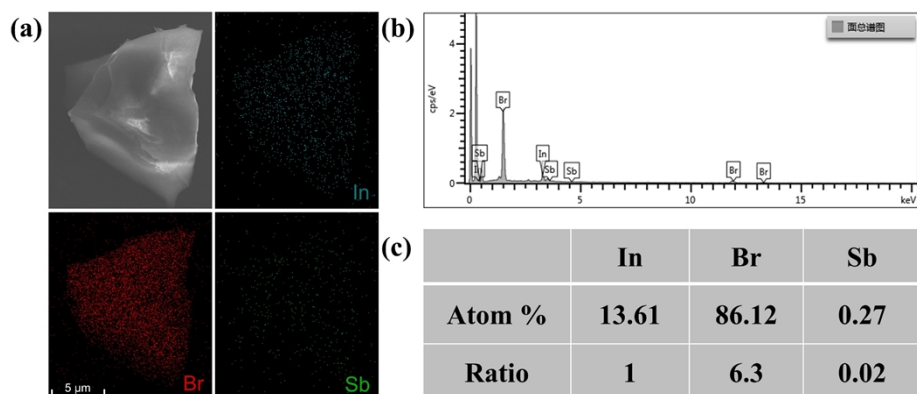

Fig. S6 (a) SEM image and the corresponding EDS mapping of elements. (b) EDS spectrum and (c) atomic percent of elements in the  $(\text{DPG})_3\text{InBr}_6: 5\% \text{Sb}$ . Scale bar: 5  $\mu\text{m}$ .

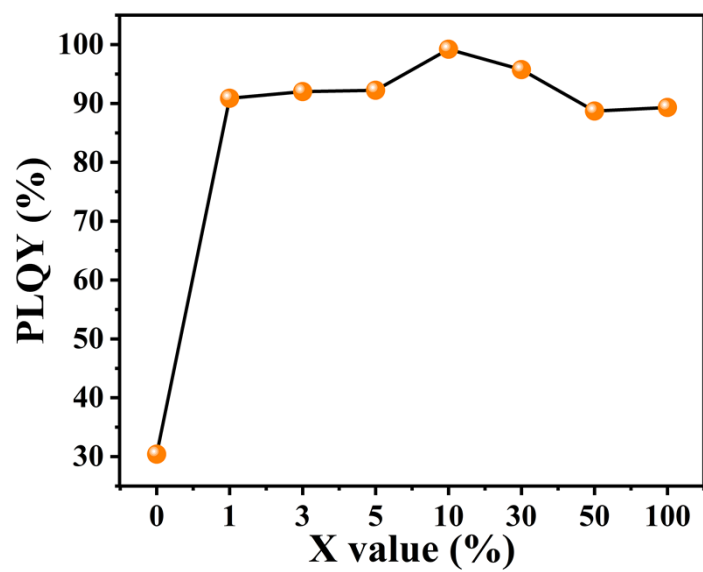

Fig. S7 The PLQY of  $(\text{DPG})_3\text{InBr}_6: x\%\text{Sb}$  ( $x=0, 1, 3, 5, 10, 30, 50, 100$ ).

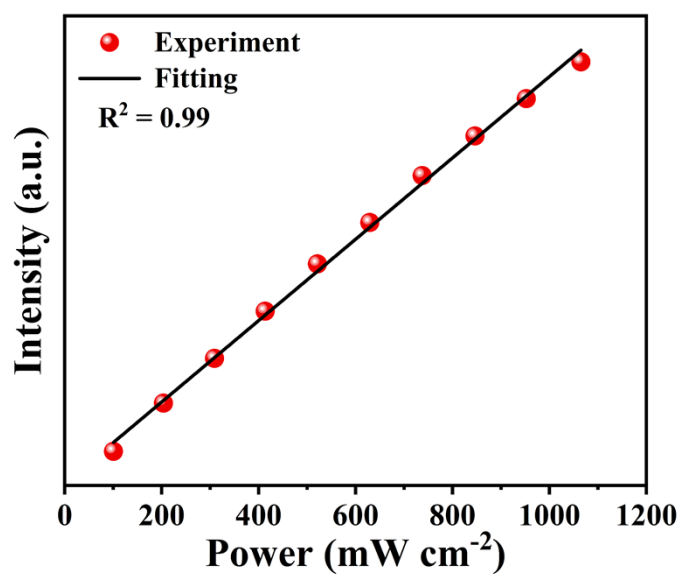

Fig. S8 PL intensity versus excitation power for  $(\text{DPG})_3\text{InBr}_6: 10\%\text{Sb}$ .



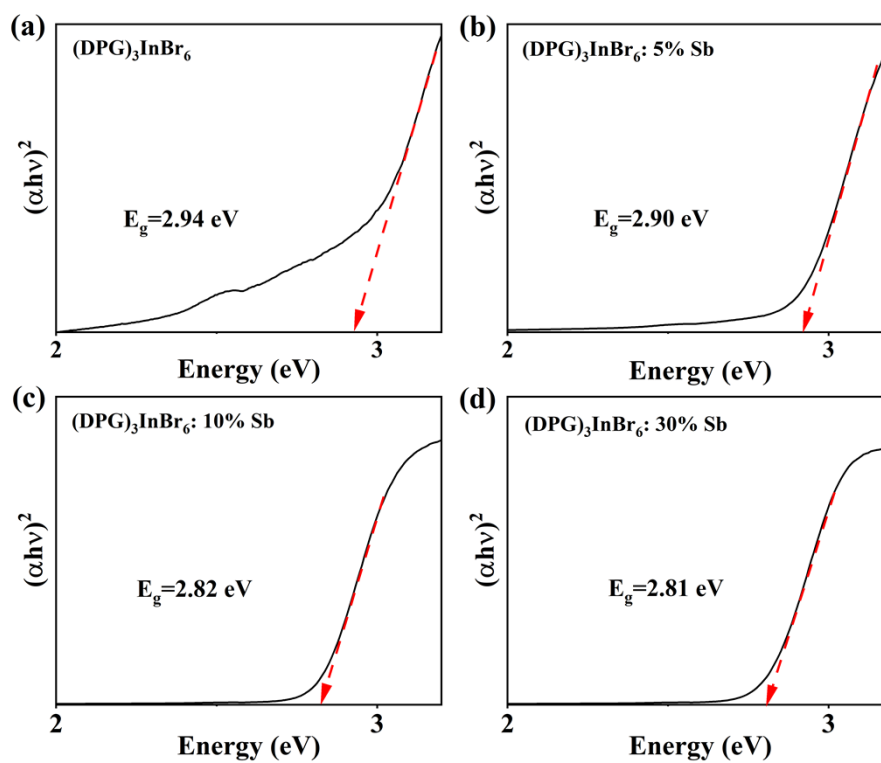

Fig. S9 The Tauc plots of  $(\text{DPG})_3\text{InBr}_6$  with different Sb doping concentrations.

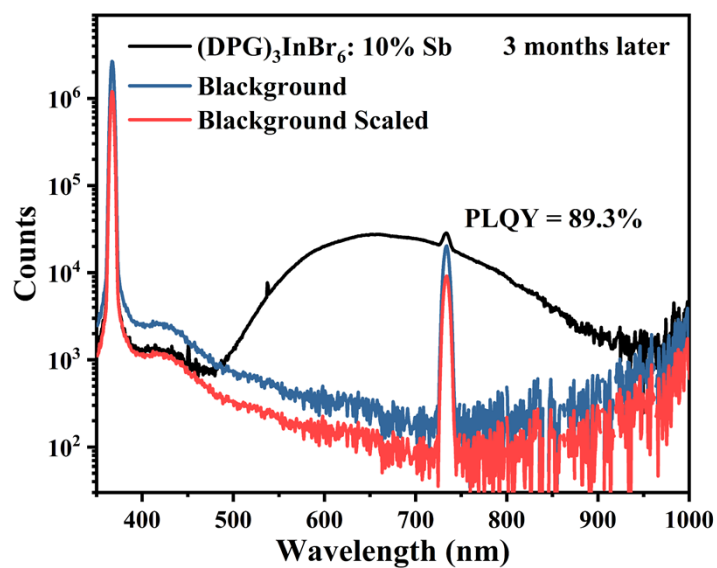

Fig. S10 PLQY measurement of  $(\text{DPG})_3\text{InBr}_6$ : 10% Sb after 3 months.

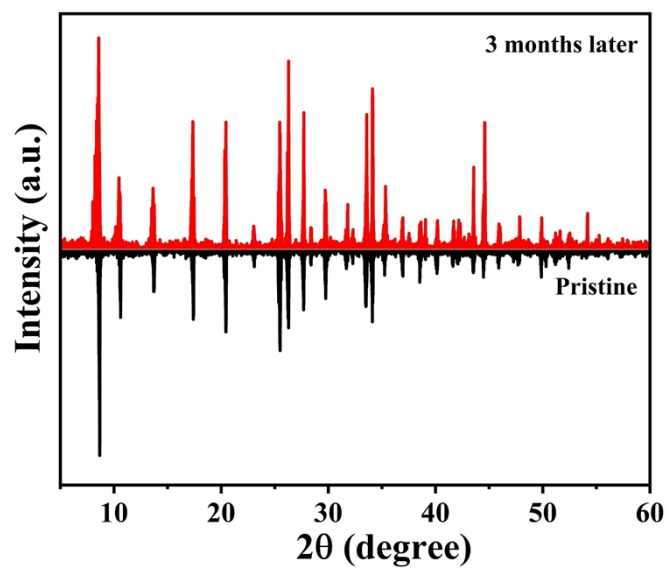

Fig. S11 PXR D patterns of (DPG)<sub>3</sub>InBr<sub>6</sub>: 10% Sb before and after 3 months.

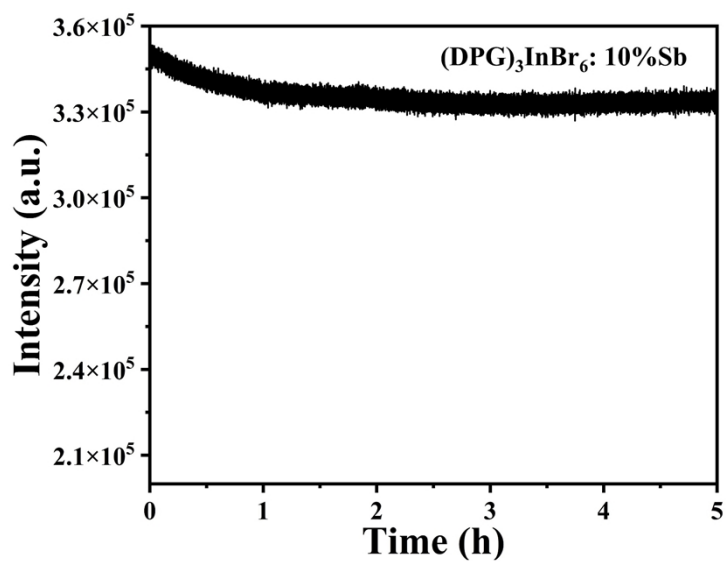

Fig. S12 Photostability of (DPG)<sub>3</sub>InBr<sub>6</sub>: 10% Sb under continuous excitation (380 nm, 150mW cm<sup>-2</sup>).

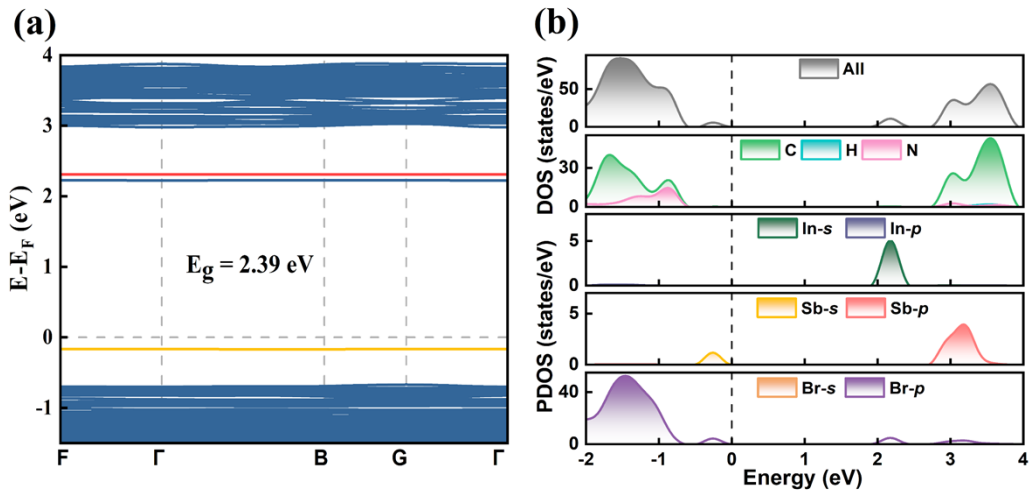

Fig. S13 the DFT calculations of electronic band structure and DOS of  $(DPG)_3InBr_6$ : Sb with six coordination.

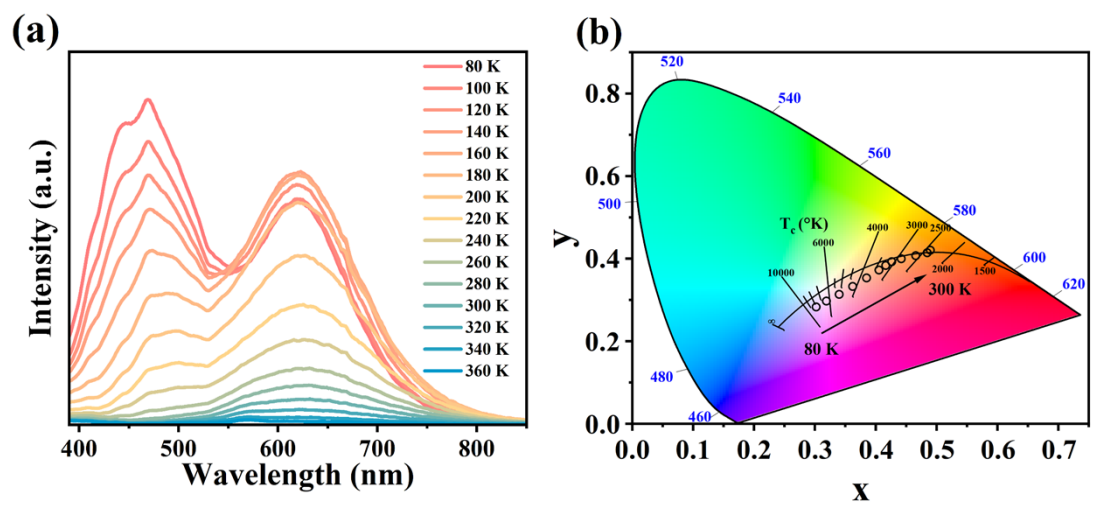

Fig. S14 (a) Emission spectrum of  $(DPG)_3InBr_6$  at different temperatures excited at 322nm. (b) CIE coordinates of  $(DPG)_3InBr_6$  at different temperatures.

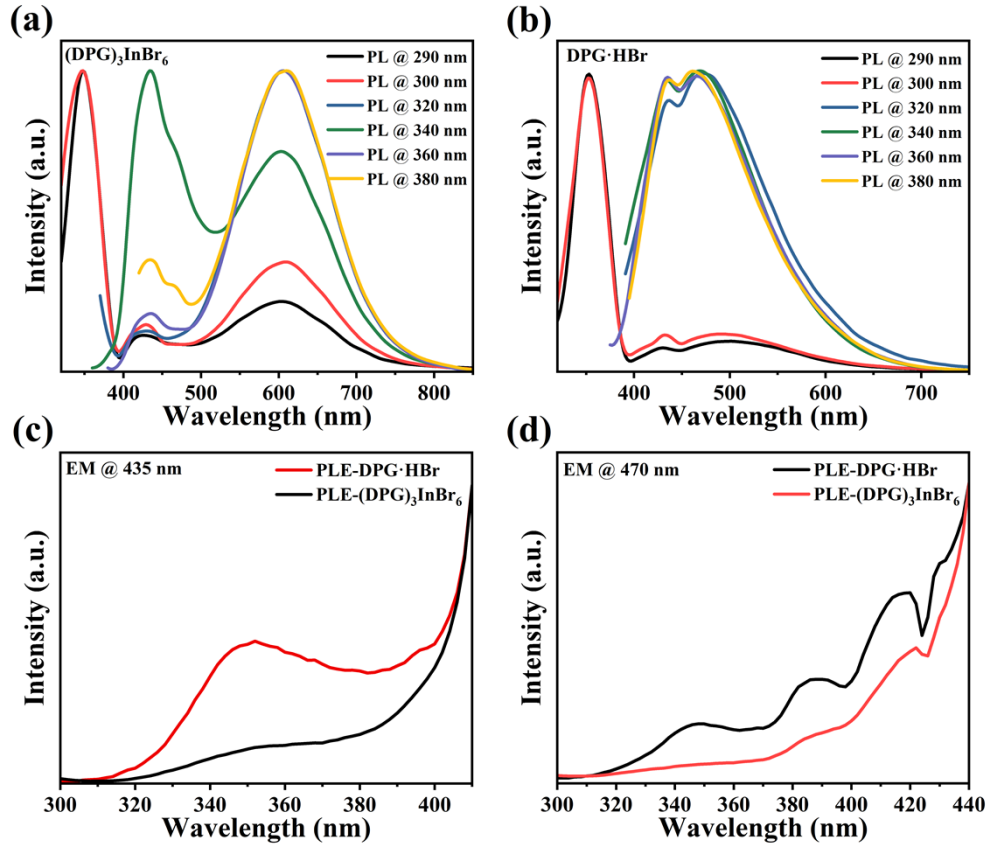

**Fig. S15** (a) The excitation-wavelength dependent PL spectra of  $(\text{DPG})_3\text{InBr}_6$  (b) and  $\text{DPG}\cdot\text{HBr}$ . (c) PLE spectra of  $(\text{DPG})_3\text{InBr}_6$  and  $\text{DPG}\cdot\text{HBr}$  monitored at 435 (d) and 470 nm.

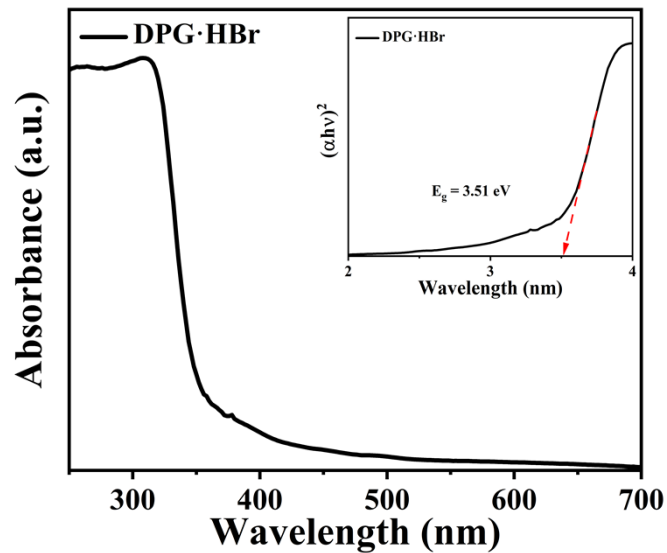

**Fig. S16** Absorption spectra of  $\text{DPG}\cdot\text{HBr}$ , Insert: Tauc plot of  $\text{DPG}\cdot\text{HBr}$ .

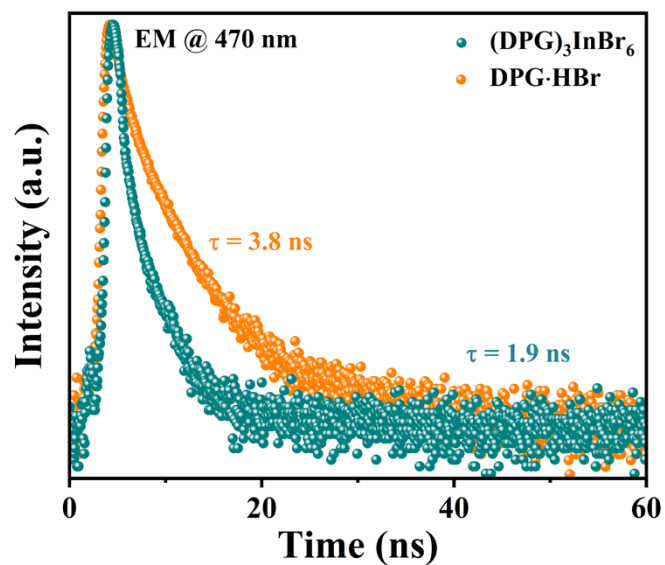

Fig. S17 Time-resolved PL decay curve of  $(\text{DPG})_3\text{InBr}_6$  and  $\text{DPG}\cdot\text{HBr}$  monitored at 470 nm.

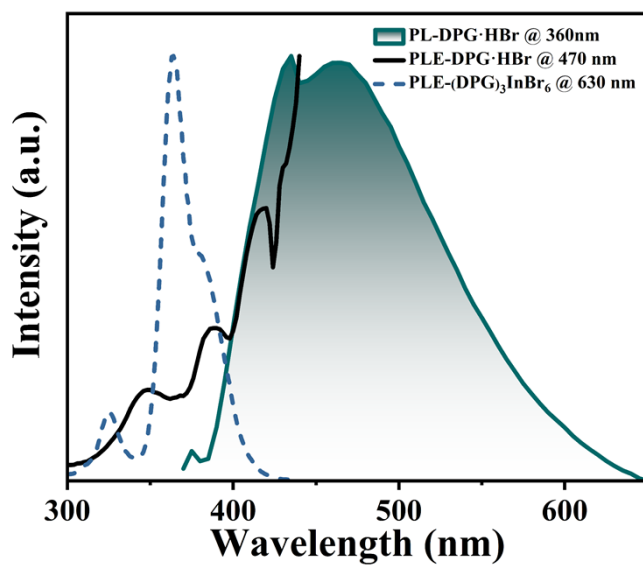

Fig. S18 PL of  $\text{DPG}\cdot\text{HBr}$  monitored at 360 nm and PLE spectra of  $\text{DPG}\cdot\text{HBr}$  monitored at 470 nm and  $(\text{DPG})_3\text{InBr}_6$  monitored at 630 nm.
